# Supplementary material for: Plant community recovery from intense deer grazing depends on reduction of graminoids and the time after exclosure installation in a semi-natural grassland
Source: PeerJ. 2019 Oct 1;7:e7833. doi: 10.7717/peerj.7833 (PMC6777482; doi:10.7717/peerj.7833)
Supplement: Table S1 — The coverage was originally recorded by the Braun-Branquet score and the mean coverage of this table was calculated after the Braun-Branquet score was converted to percentage as below: “1” was 5.5%, “2” was 17.5%, “3” was 37.5%, “4” was 62.5, and “5” was 87.5%. Therefore, the sum of mean coverage was not certainly 100%. We did not include the data of “ +” Braun-Branquet score because the plant community survey in 1981 recorded only species with the score of ≧1 on the Braun-Blanquet method. [file peerj-07-7833-s003.xlsx]

## Sheet: Sheet 1
Species	Life form	Past	Fence 2010					Fence 2011					Outside
			2011	2012	2013	2014	2015	2011	2012	2013	2014	2015	2011	2012	2013	2014	2015
Achillea alpina	Dicot	0	0	0	0	0	0	0	0	0	0	0.458333	0	0	0	0	0
Achnatherum extremiorientale	Graminoid	0	4.3	1.75	0	0	0.55	2.09091	0.916667	0.458333	1.375	1.375	28.1	24.8	21.5	15.1	24.3
Adenophora remotiflora	Dicot	0.229167	0	0	0	0	0	0	0	0	0	0	0	0	0	0	0
Adenophora triphylla var japonica	Dicot	0.6875	0.55	1.1	2.85	3.5	2.75	0	0	0	0	0	0	0	0	0	0
AGraminoidostis flaccida	Dicot	0	0	0	0	0	0	0	0	0	0	0	0	0.55	0	0	0
Anaphalis margaritacea var angustior	Dicot	0.958333	0	1.1	1.1	2.2	3.4	0	0	0	0	0	0	0	0	0	0
Angelica pubescens	Dicot	1.79167	0	0	0	0	0	0	0	0	0	0	0	0	0	0	0
Aquilegia buergeriana	Dicot	0	0.55	8.75	1.65	6.25	2.3	0.5	8.58333	8.125	6.125	16.7917	0	0	0	0.55	0.55
Arabis hirsuta	Dicot	0	0	0	0	0	0	0	0	0	0	0	0	0	0	1.65	0
Artemisia princeps	Dicot	0.958333	0.55	2.3	2.3	2.85	2.3	0	0.916667	3.375	2.375	4.29167	0	0	0	0	0
Arundinella hirta	Graminoid	0	0	0	1.65	0.55	0	0	0	0	0	0	0	0	0	0	0
Astilbe microphylla	Dicot	1.875	0	0	0.55	2.2	1.65	0	0	0	0	0	0	0	0	0	0
Brachypodium sylvaticum	Graminoid	0	55.5	25.1	16.4	6.5	6.25	17.7727	22.9167	18.8333	17.5833	8.875	30.6	37.8	19.1	25.5	55
CalamaGraminoidostis arundinacea var brachytricha	Graminoid	0	0	0	0	0	0	0	3.125	0.458333	0	0	0	0	0	0	0
Campanula punctata var hondoensis	Dicot	0.458333	0	0.55	1.1	0.55	0.55	0	2.375	2.75	1.83333	0	0	0	0.55	0	0
Carex breviculmis	Graminoid	0	0	0	0	0	0	0	3.20833	4.75	0.916667	0	0	0	0.55	0.55	0
Carex nanella	Graminoid	0	4.6	17.3	24.5	24	20.8	5.68182	5.20833	7.58333	5.95833	7.41667	0	0	0	0	0
Carex oxyandra	Graminoid	0	1.75	1.75	0.55	1.65	1.1	0.5	0.458333	0	0.916667	0.916667	0	0	0	0	0
Chaenomeles japonica	Woody plants	0	0	0	0.55	0.55	0.55	0	0	0	0	0	0	0	0	0	0
Cirsium Graminoidatiosum	Dicot	0	0	0	0	0	0	0.5	7.70833	11.4583	9.20833	9.20833	3.75	0	0	0	0
Clinopodium chinense var parviflorum	Dicot	0	0	0	0	0	0	0	0	0	0	0	0	0	0	0.55	0
Dianthus superbus var longicalycinus	Dicot	0	0	0	1.1	0.55	0.55	0	0	0	0	0	0	0	0	0	0
Dryopteris expansa	Fern	2.75	0	0	0	0	0	0	0	0	0	0	0	0	0	0	0
Epilobium angustifolium	Dicot	2.375	0	0	0	1.1	1.1	0	0	0	0	0	0	0	0	0	0
Festuca ovina var coreana	Graminoid	0	1.75	0	0	0	0	0	0	0	0	0	0	0	0	0	0
Filipendula multijuga	Dicot	0	0	0	0	0	0	0	0	0	1.375	1.375	0	0	0	0	0
Fragaria nipponica	Dicot	0	0	6.25	0	0	0	1	5.75	10.5417	16.6667	17.125	1.1	0	0	1.65	0.55
Geranium eriostemon var reinii	Dicot	6.70833	0	2.2	4.5	5.05	1.65	0	0	0	0	0	0	0	0	0	0
Hakonechloa macra	Graminoid	0.458333	0	0	0	0	0	0	0	0	0	0	0	0	0	0	0
Hypericum ascyron	Dicot	0	0	0	0	0	0	0	0	0	0	0.458333	0	0	0	0	0
Iris sanguinea	Monocot	64.8125	1.1	16.15	11.2	15.9	18.3	0	0	0	1.91667	2.29167	0	0	0	0	0
Ixeris dentata	Dicot	0.229167	0	0	0	0	0	0	0	0	0	0	0	0	0	0	0
Ligularia dentata	Dicot	1.5625	0	0	0	0	0	0	6.95833	1.375	0.916667	2.375	0.55	0.55	0	0.55	0.55
Lilium leichtlinii var tiGraminoidinum	Monocot	0	0	1.1	0	0	0	0	0	0	0	0	0	0	0	0	0
Luzula multiflora	Graminoid	0	0	0	0	0	0	0	0	0	0	0.458333	0	0	0	0	0
Miscanthus sinensis	Graminoid	0	1.75	0	1.75	1.75	0.55	0	0	0	0	0	0	0	0	0	0
Moehringia lateriflora	Dicot	0	0	0	0	0.55	0.55	0	0	0	0.458333	2.375	0	0	0	0.55	0
Oxalis corniculata	Dicot	0	0	0	0	0	0	0	0	0	0	0	2.85	0.55	1.1	0.55	0
Phagopteris connectilis	Fern	0	0	2.3	2.85	7.15	3.4	0	0	0	0	0	0	0	0	0	0
Picris hieracioides var glabrescens	Dicot	0.229167	0	0	0	0.55	0.55	0	0	0	0	0	0	0	0	0	0
Polygonatum odoratum var pluriflorum	Monocot	0.6875	0	0	0	0	0	0	0	0	0	0	0	0	0	0	0
Polygonum cuspidatum	Dicot	0.229167	0	0	0	0	0	0	0	0.916667	0.916667	1.375	0	0	0	0	0
Potentilla freyniana	Dicot	0	0	0	0	0	0	0	0.458333	0.916667	2.91667	2.375	0	0	0	0.55	0.55
Ranunculus japonicus	Dicot	0.229167	6.35	11.3	2.2	1.1	1.65	0	4.20833	0.916667	0	0	2.2	0	0.55	1.1	1.65
Rosa luciae var fujisanensis	Woody plants	0	0	0	0	0	0	0	0	0	0.458333	0.458333	0	0	0	0	0
Rubus microphyllus var subcrataegifolius	Woody plants	0	0	1.1	4.05	7.25	7.25	0	0	0	0	0	0	0	0	0	0
Scabiosa japonica	Dicot	3.16667	1.1	1.65	4.6	7.7	7.15	0	0	0	0.458333	1.91667	0	0	0	0	0
Sedum kamtschaticum	Dicot	0.229167	0	0	0	0	0.55	0	0	0	0	0.916667	0	0	0	0	0
Senecio cannabifolius	Dicot	3.25	0	0	0	0.55	0.55	0	0	0	0	0.458333	0	0	0	0	0
Senecio flammeus var glabrifolius	Dicot	0.6875	0	0.55	0.55	1.65	1.1	10.5	7.875	3.20833	3.20833	3.66667	2.2	2.85	5.7	11.6	6.15
Serratula coronata var insularis	Dicot	21.9375	0	0.55	6.35	11.2	10.25	0	0	0	1.375	2.83333	0	0	0	0	0
Solidago virgaurea var asiatica	Dicot	0.916667	0	0.55	1.65	2.85	3.4	0	0	0	0	0	0	0	0	0	0
Synurus excelsus	Dicot	0	0	0	0.55	0.55	0.55	0	0	0	0	0	0	0	0	0	0
Veronicastrum sibiricum	Dicot	6.08333	0	0	4.05	4.05	2.2	0	0	0	2.29167	2.29167	0	0	0	0	0.55
Viola acuminata	Dicot	0	0	0	0	0	0	0	0	0.458333	0	0	0	0	0	0	0
Viola Graminoidypoceras	Dicot	0	0	0	0	0	0	0	0	0	0	0	0	0	0	0.55	0.55
