# Supplementary material for: Plant community recovery from intense deer grazing depends on reduction of graminoids and the time after exclosure installation in a semi-natural grassland
Source: PeerJ. 2019 Oct 1;7:e7833. doi: 10.7717/peerj.7833 (PMC6777482; doi:10.7717/peerj.7833)
Supplement: Table S2 [file peerj-07-7833-s004.xlsx]

## Sheet: Sheet1
Intercept	Life form	Treatments	Protected year	Life form × Protected year	df	Log likelihood	AIC
+	+		0.329	+	16	-3511.85	7056
+	+	+	0.3068	+	18	-3511.18	7058
+	+		0.2456		12	-3565.21	7154
+	+	+	0.2479		14	-3564.02	7156
+	+	+			13	-3572.52	7171
+	+				11	-3591.78	7206
+			0.2432		8	-3636.71	7289
+		+	0.2459		10	-3635.71	7291
+		+			9	-3644.25	7307
+					7	-3663.54	7341
