# Supplementary material for: Plant community recovery from intense deer grazing depends on reduction of graminoids and the time after exclosure installation in a semi-natural grassland
Source: PeerJ. 2019 Oct 1;7:e7833. doi: 10.7717/peerj.7833 (PMC6777482; doi:10.7717/peerj.7833)
Supplement: Table S3 [file peerj-07-7833-s005.xlsx]

## Sheet: Sheet1
Intercept	Coverage of graminoids	Treatments	Protected year	df	Log likelihood	AIC
+	0.008846	+	-0.3768	8	18804.6	-37590
+	0.008889		-0.3906	6	18783	-37550
+		+	-0.4277	7	18783.5	-37550
+			-0.4397	5	18762.3	-37510
+	0.01454	+		7	18710.8	-37410
+	0.01524			5	18677.6	-37350
+		+		6	18649.1	-37290
+				4	18611.4	-37210
